# Supplementary material for: Tunable electrochemical properties of fluorinated graphene
Source: Royal Society of Chemistry journal article supplement (doi:10.1039/c3ta11710c), 2013-01-01
Supplement: c3ta11710c.pdf [file c3ta11710c.pdf]

## Supporting Information

Figure S1 shows the intact sheet architecture after fluorination for  $\text{CF}_{0.89}$  material. Figure S2 clearly indicates that  $\text{CF}_{0.89}$  is a white powder but the color turns black with decreased fluorine content indicating improved conductivity. Figure S3 shows the TEM images of  $\text{CF}_{0.66}$  and  $\text{CF}_{0.89}$  samples after the first discharge cycle. The red circles indicate the LiF domains formed during the discharge process.

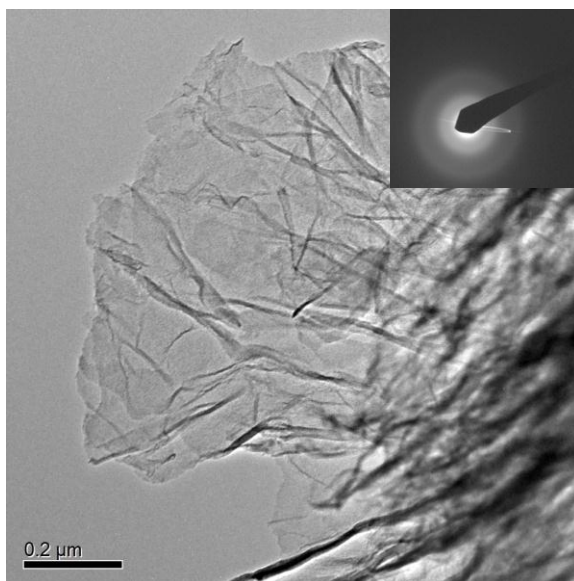

Figure S1: TEM image of as synthesized  $\text{CF}_{0.89}$  material indicating sheet architecture.

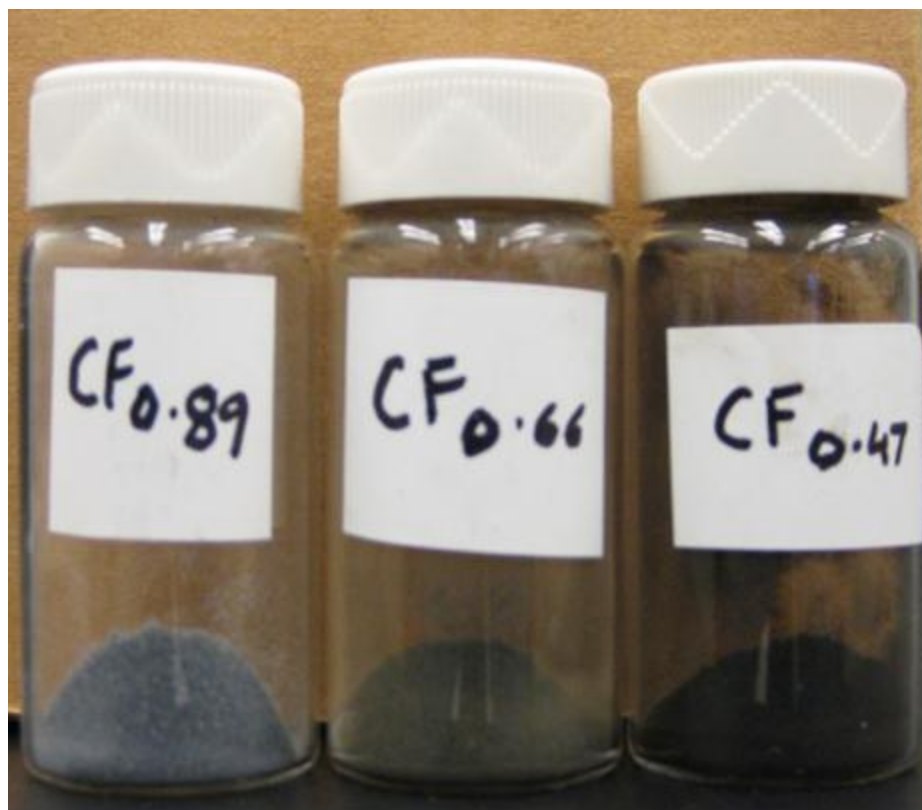

Figure S2: Picture indicating the color darkening with decreased fluorine content for fluorinated graphene.

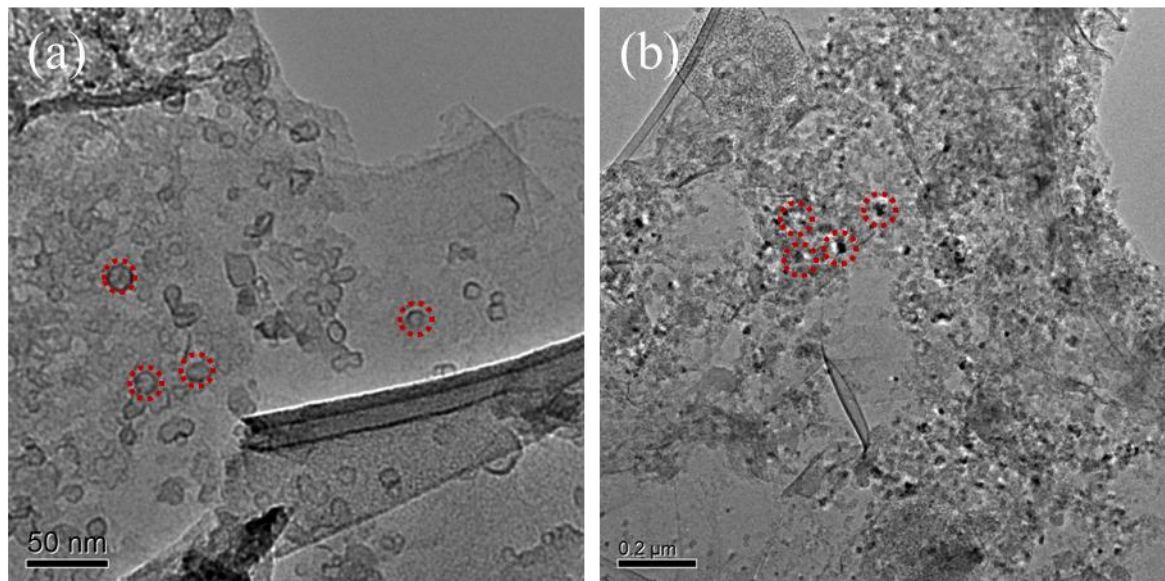

Figure S3: TEM image of  $\text{CF}_{0.66}$  and  $\text{CF}_{0.89}$  material after the discharge cycle indicating crystalline domains of LiF (red circles).
